# Supplementary material for: Unrevealing the Potential of Sansevieria trifasciata Prain Fraction for the Treatment of Androgenetic Alopecia by Inhibiting Androgen Receptors Based on LC-MS/MS Analysis, and In-Silico Studies
Source: MDPI journal article supplement (doi:10.3390/molecules27144358), 2022-07-07
Supplement: s1 [file s1]

## Supporting information;

# Unrevealing The Potential of *Sansevieria trifasciata* Prain Fraction For The Treatment of Androgenetic Alopecia by Inhibiting Androgen Receptors Based on LC-MS/MS Analysis, and in-silico Studies

Henny Kasmawati<sup>1,4,\*</sup>, Resmi Mustarichie<sup>2,\*</sup>, Eli Halimah<sup>3</sup>, Ruslin Ruslin<sup>4</sup>, Arfan Arfan<sup>5</sup>, Nurramadhani A. Sida<sup>6</sup>

<sup>1</sup>Doctoral Program in Pharmacy, Faculty of Pharmacy, Universitas Padjadjaran, Bandung, Indonesia, 45363; hennykasmawati@uho.ac.id

<sup>2</sup>Department of Analytical Pharmacy and Medicinal Chemistry, Faculty of Pharmacy, Universitas Padjadjaran, Bandung, Indonesia, 45363; resmi.mustarichie@unpad.ac.id

<sup>3</sup>Department of Pharmacology and Clinical Pharmacy, Faculty of Pharmacy, Universitas Padjadjaran, Bandung, Indonesia, 45363; eli.halimah@unpad.ac.id

<sup>4</sup>Faculty of Pharmacy, Universitas Halu Oleo, Kendari, Indonesia, 93232; hennykasmawati@uho.ac.id (HK); mahaleo241@yahoo.co.id (RR); arfan09@uho.ac.id (AA); apt.nurramadhani08@gmail.com (NAS)

\* Correspondence: hennykasmawati@uho.ac.id; (Henny Kasmawati), and resmi.mustarichie@unpad.ac.id (Resmi mustarichie)

**Table S1** The m/z profile of identified compounds in subfractions C, D, E, F

### 1. The LC-MS/MS Analysis of FRACTION C sample

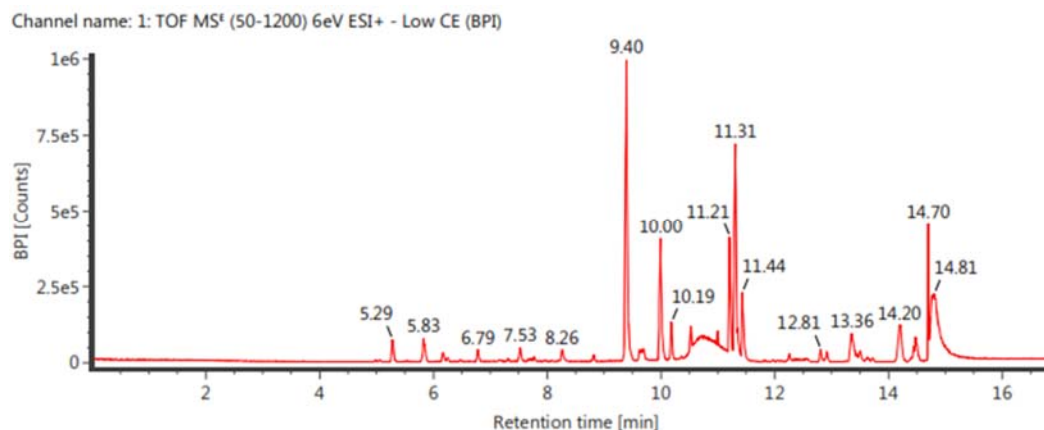

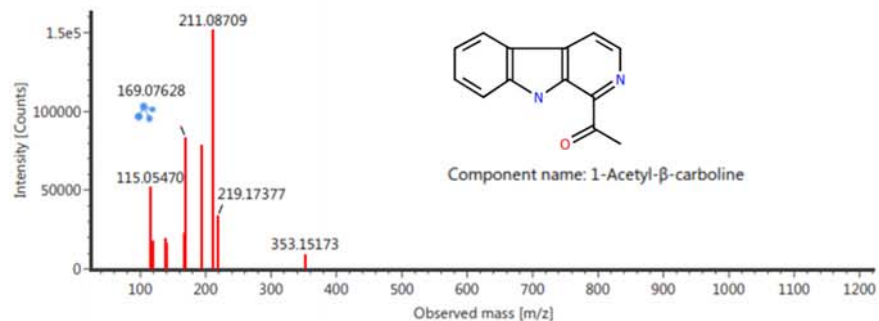

Peak 1

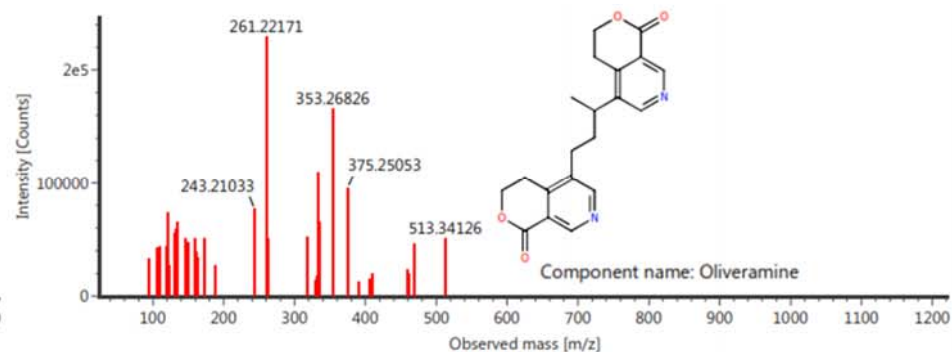

Peak 2

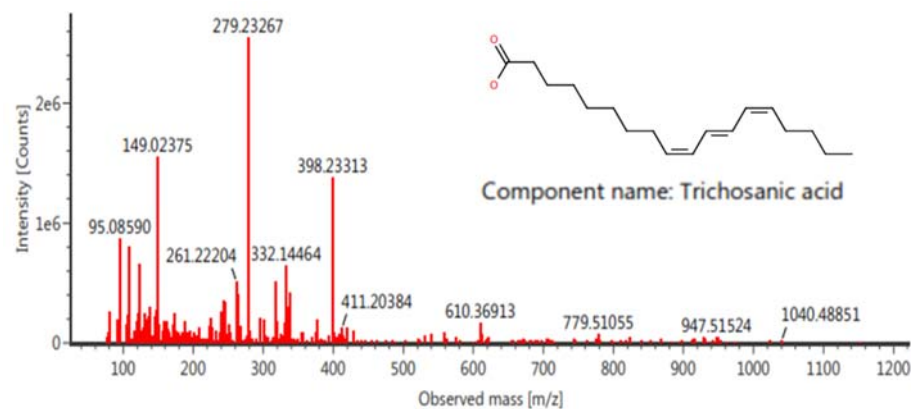

Peak 3

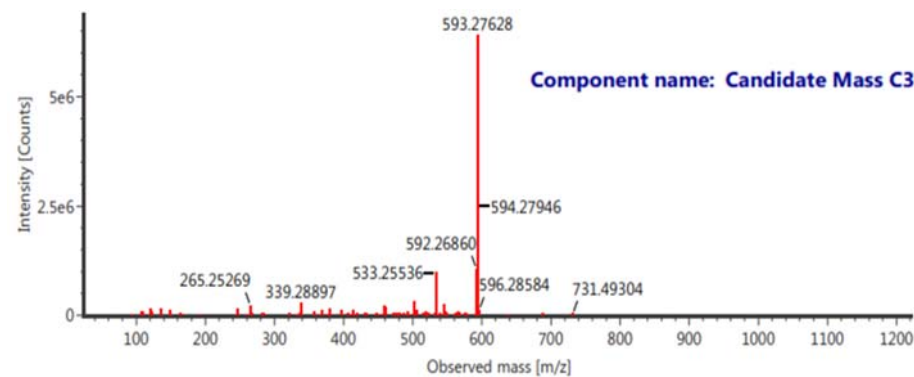

Peak 4

## 2. The LC-MS/MS Analysis of FRACTION D sample

Channel name: 1: TOF MS<sup>E</sup> (50-1200) 6eV ESI+ - Low CE (BPI)

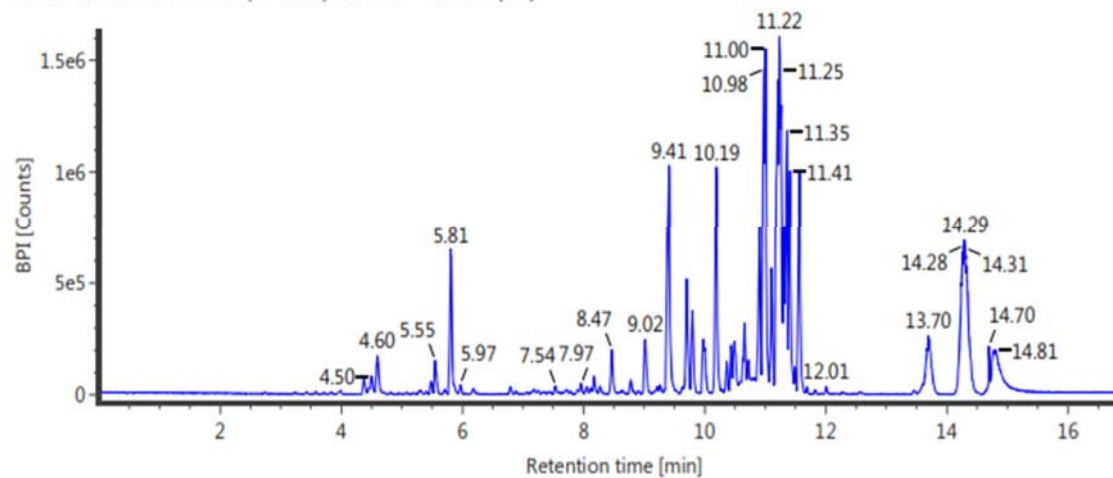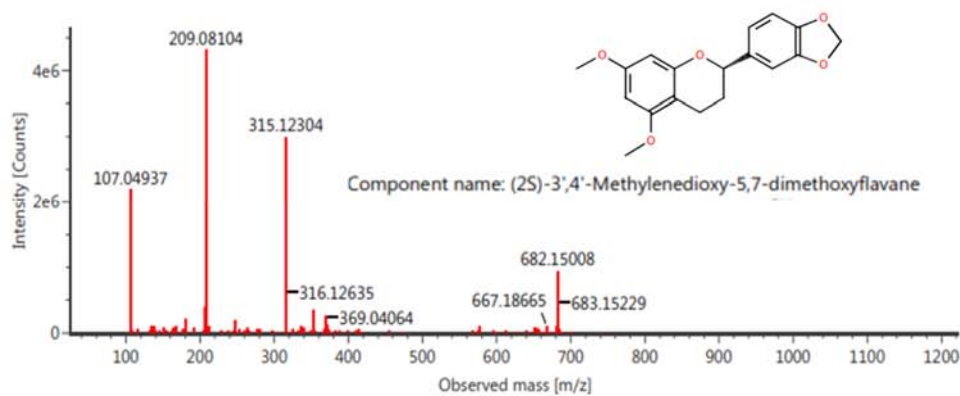

Peak 1

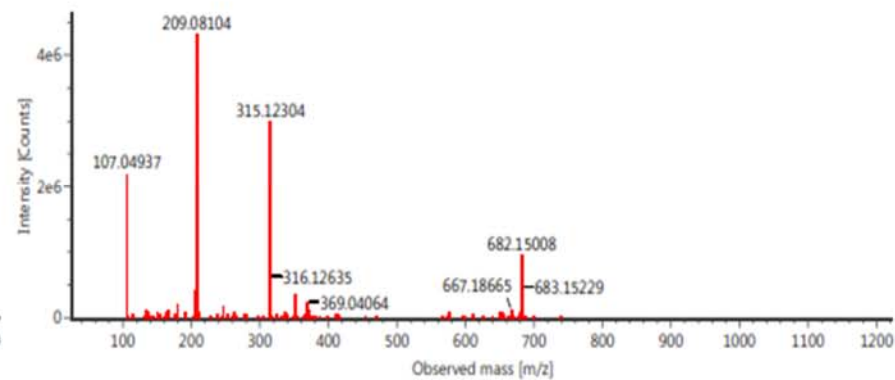

Peak 2

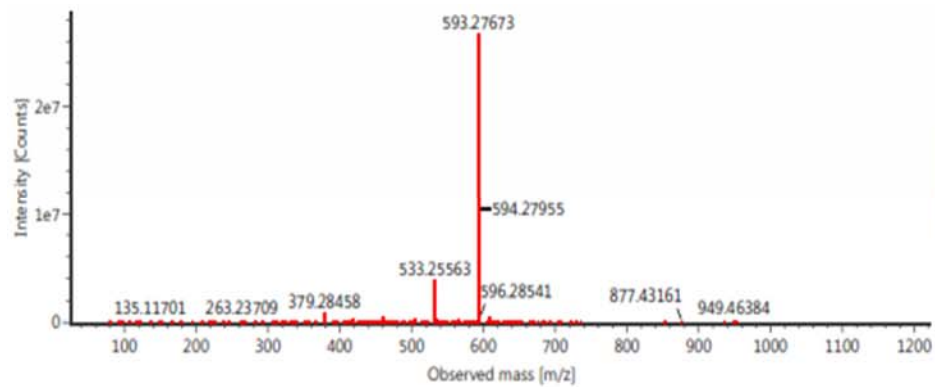

**Peak 3**

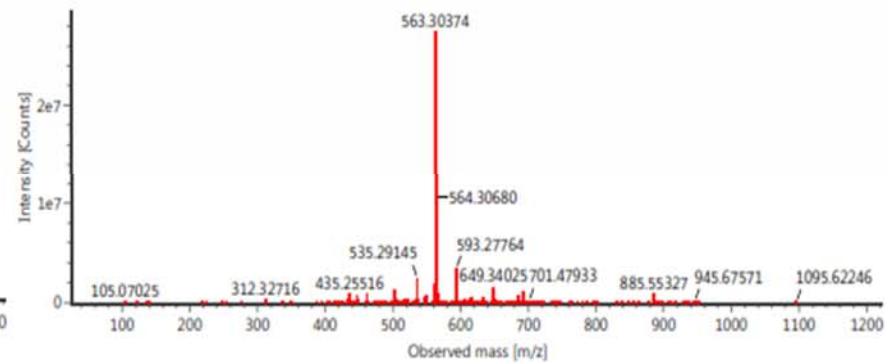

**Peak 4**

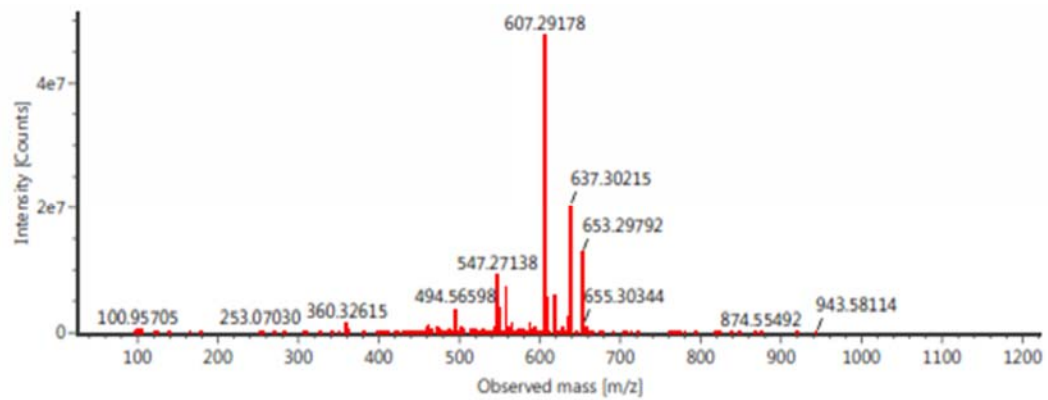

**Peak 5**

### 3. The LC-MS/MS Analysis of FRACTION E sample

Channel name: 1: TOF MS<sup>E</sup> (100-1200) 6eV ESI+ - Low CE (BPI)

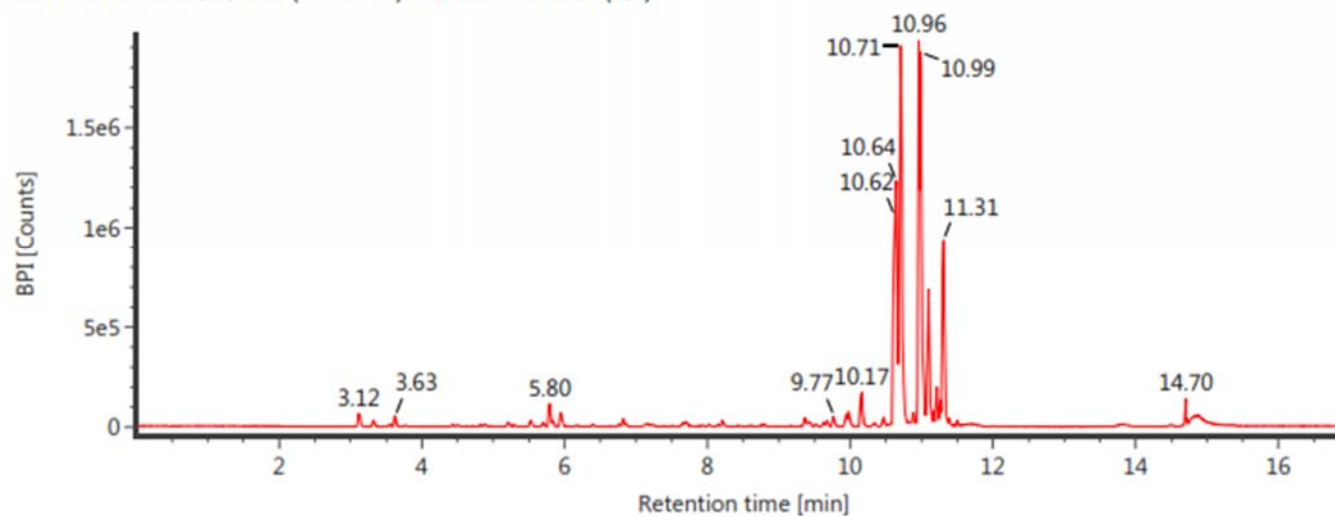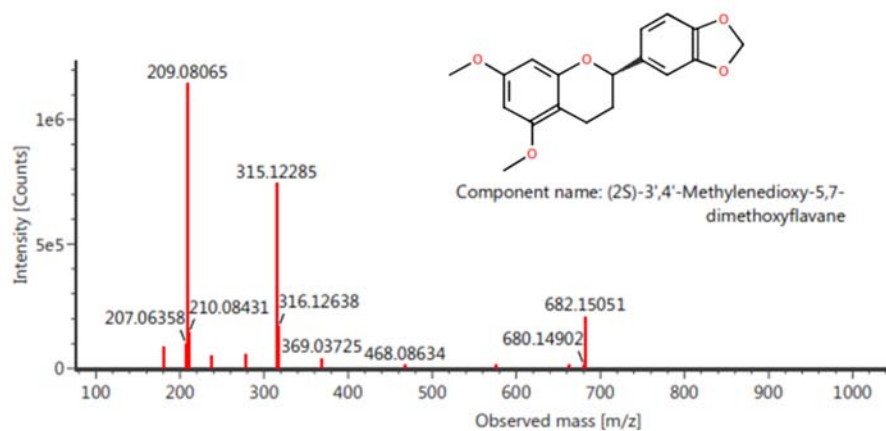

Peak 1

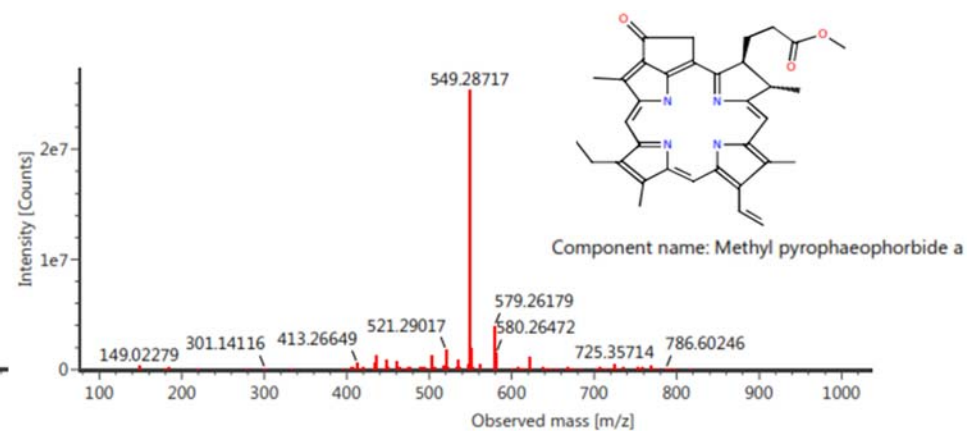

Peak 2

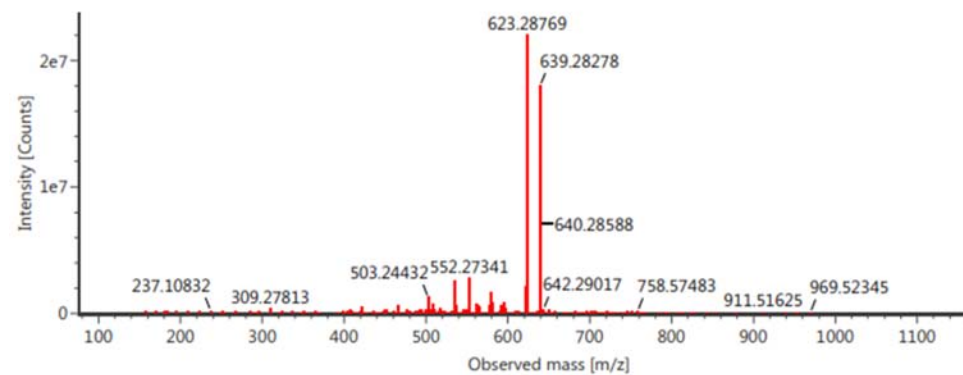

Peak 3

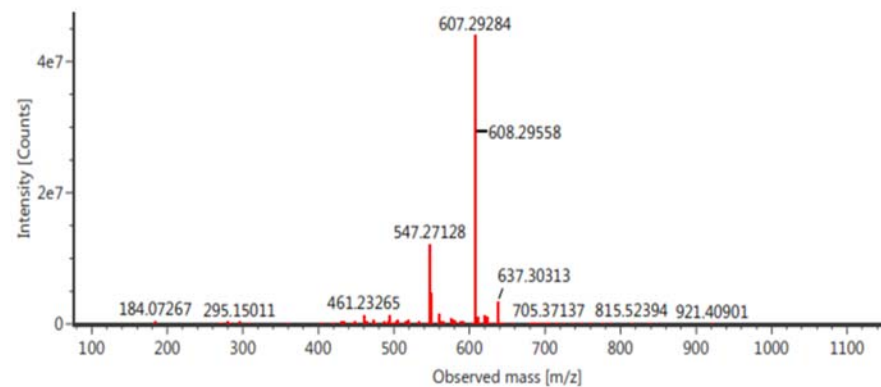

Peak 4

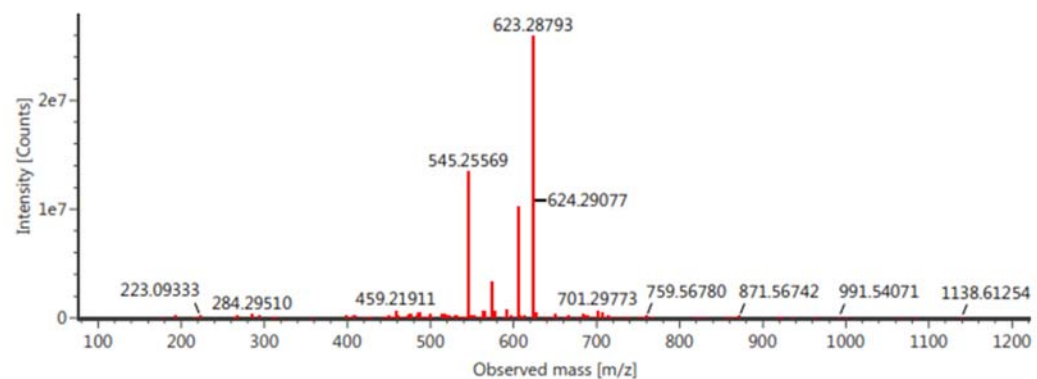

Peak 5

#### 4. The LC-MS/MS Analysis of FRACTION F sample

Channel name: 1: TOF MS<sup>E</sup> (100-1200) 6eV ESI+ - Low CE (BPI)

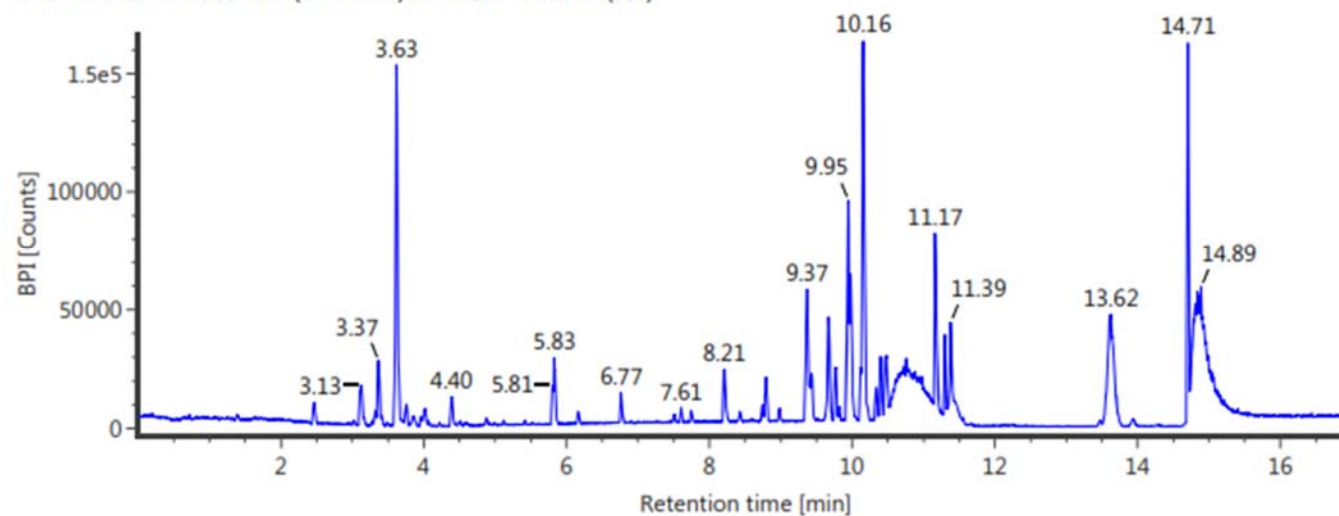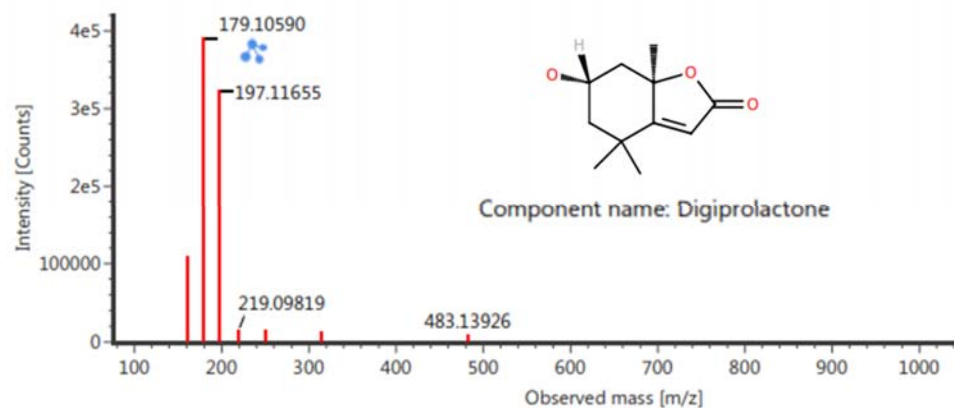

Peak 1

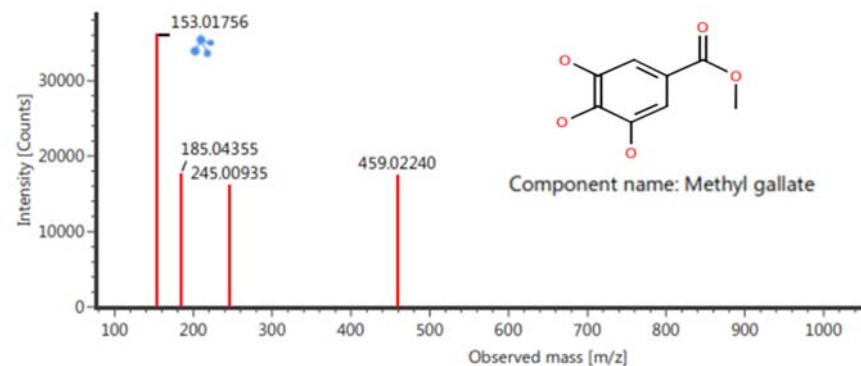

Peak 2

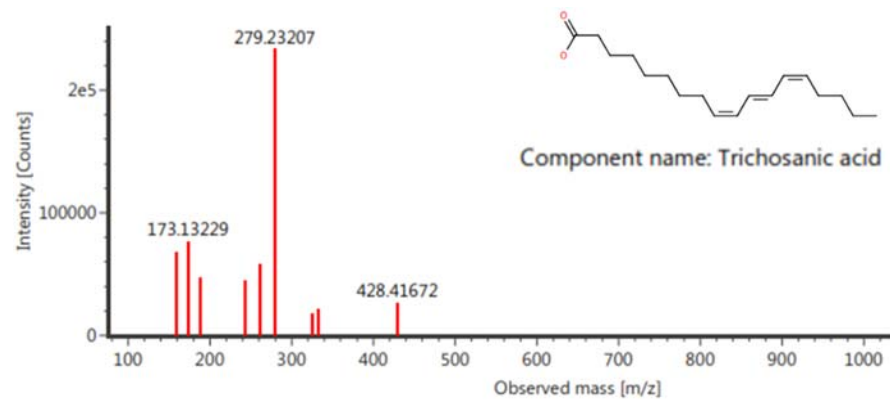

Peak 3

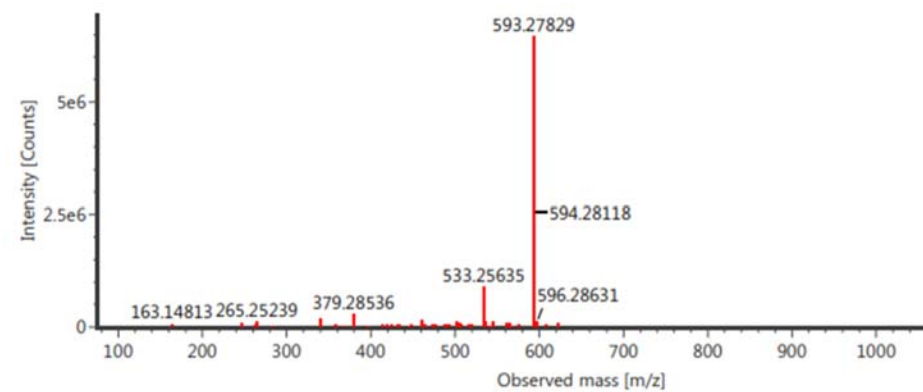

Peak 4

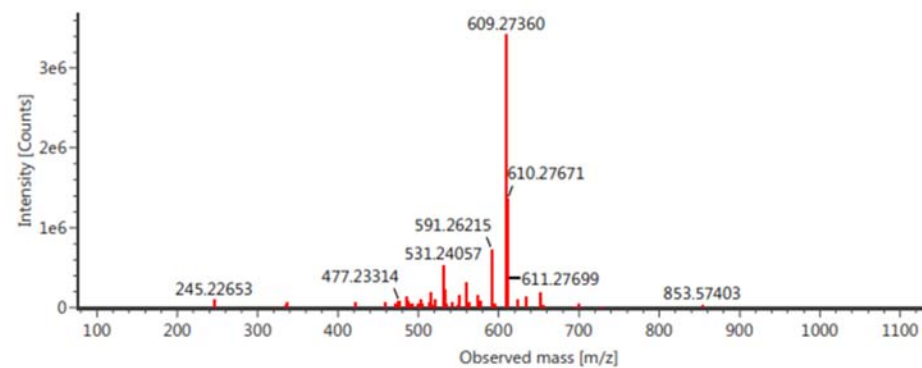

Peak 5
